# Supplementary material
Source: PubMed Central journal article supplement (PMC3329395)

## Supplemental Materials and Methods

### ***β3AR* mRNA expression and β3-AR signaling assessment.**

Expression levels of *β3AR* were determined by quantitative qRT-PCR. Briefly, RNA was isolated from frozen adipose tissue using Qiagen RNeasy tissue kit following the manufacturer's protocol (Qiagen). cDNA was synthesized from the isolated RNA using SuperScript III and random hexamers (Invitrogen). Quantitative PCR was performed with the Light Cycler-fast start master SYBR green mix (Roche Diagnostics) with the following primer sets: b3ar-for: 5'-cag cca gcc ctg ttg aag-3' and b3ar-rev: 5'-cct tca tag cca tca aac ctg-3'. To evaluate the *in vivo* β3-adrenergic signaling, CL316, 243 was injected intraperitoneally into BALB/c and B6 *ob/ob* mice. Before injection, 15 and 30 min later blood was collected from tail vein and analyzed for serum glycerol levels.

## Supplemental figure legends

### **Supplemental figure 1. *Agrp* deletion improve glucose homeostasis in *ob/ob* mice.** (A)

Representation of fasting glucose and fasting insulin levels measured in serum from C57BL6/J (B6) *ob/ob* and *ob/ob Agrp<sup>-/-</sup>* males. (B) HOMA index was calculated in B6 *ob/ob* and *ob/ob Agrp<sup>-/-</sup>* mice (n=5). Data are expressed as average±SEM. Unpaired t-tests were performed \*, #  $P<0.05$  for glucose and insulin, respectively.

### **Supplemental figure 2. BALB/c mice are resistant to obesity and glucose intolerance**

**induced by high fat diet.** (A) Body composition (fat mass and fat-free mass) were analyzed in

BALB/c and C57BL6/J (B6) males and females fed a high fat diet (HFD) for 3 months (n=5-11).

(B) Fasting glycemia and insulin level were measured in 3 months HFD mice after a 12h fast. \*,

#  $P<0.05$  for glucose and insulin, respectively. (C) Glucose tolerance test (GTT) was performed

by measuring glycemia after an overnight fast at the indicated times after intraperitoneal

injection of glucose, and area under the curve (AUC) was calculated in HFD BALB/c and B6

females (n=4). Data are expressed as average±SEM. Unpaired t-tests were performed

\*\*\* $P<0.0005$ .

### **Supplemental figure 3. Energy expenditure and adipose tissue lipases expression in**

**BALB/c and C57BL6/J mice on high fat diet (HFD)** (A) Oxygen consumption normalized to

fat-free body mass was determined during light and dark cycle (n=4). (B) adipose triglyceride

lipase (ATGL) and (C) comparative gene identification-58 (CGI-58) protein, (D) total hormone

sensitive lipase (HSL), (E) phosphorylated HSL on S660 expression in inguinal adipose tissue

from BALB/c and B6 fed a HFD for 3 months (n=5). Data are expressed as average±SEM. Two-way ANOVA (A) and unpaired t-tests (B, C, D, E) were performed \* $P$ <0.05, \*\* $P$ <0.005.

**Supplemental figure 4. Unchanged  $\beta$ 3-adrenergic signaling between BALB/c and B6 *ob/ob* mice.** (A) Quantification by qRT-PCR of mRNA expression of the beta3 adrenergic receptor ( $\beta$ 3-AR) normalized to *Actin*. (B) Glycerol concentrations measured in fed mice before CL 316,243 administration, 15 min and 30 min following intraperitoneal injection in BALB/c and B6 *ob/ob* mice. (n=5). Data are expressed as average±SEM. Unpaired t-tests were performed \* $P$ <0.05

**Supplemental figure 5. HSL and Perilipin A protein expression in BALB and B6 *ob/ob* adipose tissue.** Immunoblots and densitometry analysis of (A) hormone-sensitive lipase (HSL), phosphorylated HSL on (B) S563 and (C) S660, (D) Perilipin A in inguinal fat from BALB/c, C57BL6/J (B6) and F1 *ob/ob* (n=6). Data are expressed as average±SEM. One-way ANOVA (A) and unpaired t-tests (B, C, D) tests were performed \* $P$ <0.05, \*\* $P$ <0.005,

**Supplemental figure 6. CAY10499 inhibits  $\beta$ 3AR agonist induced lipolysis.** FFA release from fat explants incubated with or without CL 316,243 and CAY10499. (n=6). Data are expressed as average±SEM. One-way ANOVA test was performed \* $P$ <0.05.

**Supplemental Table 1.** Genotyping of SNPs located on mouse chromosome 2.

The underlined markers were not found polymorph between C57BL6/J and BALB/c parental strains

<sup>1</sup> from the Mouse Genome Database ( [www.phenome.jax.org](http://www.phenome.jax.org) )

<sup>2</sup> Digestion product size obtained after amplification and digestion, with the indicated enzyme, of genomic DNA from C57BL6/J and BALB/c mice.

| Marker ID         | Chr.2<br>location<br>(Mb) | Primer sequence 5'-3'                                        | Alleles <sup>1</sup> | Enzyme | Expected<br>restriction<br>fragment length <sup>1</sup> | Results         |                 |
|-------------------|---------------------------|--------------------------------------------------------------|----------------------|--------|---------------------------------------------------------|-----------------|-----------------|
|                   |                           |                                                              |                      |        |                                                         | C57BL6/J<br>DNA | BALB/c<br>DNA   |
| <u>rs3678168</u>  | 5.57                      | For: cattcaagagccggcaaat<br>Rev: taagagggccagcattttg         | B6: G<br>BALB: T     | Alu1   | B6: 96+55bp<br>BALB: 151bp                              | 96+55bp         | 151bp           |
| <u>rs27233322</u> | 24.7                      | For: tcaccgtcctctgtttaat<br>Rev: tgaatgggtttctttcc           | B6: A<br>BALB: T     | Pst1   | B6: 112+89bp<br>BALB: 201bp                             | <u>112+89bp</u> | <u>112+89bp</u> |
| <u>rs3722052</u>  | 27                        | For: atcaaaagggcaaaagtc<br>Rev: tcttgagggtattcaaaa           | B6: C<br>BALB: T     | Rsa1   | B6: 203bp<br>BALB: 136+67bp                             | <u>203bp</u>    | <u>203bp</u>    |
| <u>rs27909730</u> | 46.8                      | For: aaaactgaaaagtcacagactga<br>Rev: tttgttgtttgtttgtttg     | B6: T<br>BALB: G     | Alu1   | B6: 95+79bp<br>BALB: 174bp                              | <u>95+79bp</u>  | <u>95+79bp</u>  |
| <u>rs27923765</u> | 47.7                      | For: tttggtataggcctgggaat<br>Rev: ttatcaaatcaaatcaaaaggataac | B6: T<br>BALB: C     | Alu1   | B6: 72+31bp<br>BALB: 103bp                              | <u>72+31bp</u>  | <u>72+31bp</u>  |
| <u>rs27927249</u> | 51.7                      | For: attcttctggcaccattgc<br>Rev: ccagtttgggaattgtct          | B6: C<br>BALB: A     | Bsaj1  | B6: 72+64bp<br>BALB: 136bp                              | <u>72+64bp</u>  | <u>72+64bp</u>  |
| <u>rs27908937</u> | 56.9                      | For: gtcattggcctcagatgat<br>Rev: tgagtcaaaaccacaaactct       | B6: C<br>BALB: G     | Pst1   | B6: 111+90bp<br>BALB: 201bp                             | <u>111+90bp</u> | <u>111+90bp</u> |
| <u>rs28057095</u> | 60.3                      | For: gtggttagatcccgtttgc<br>Rev: ttctgtgctgcaagcatttc        | B6: T<br>BALB:C      | Alu1   | B6: 105+65bp<br>BALB: 170bp                             | <u>105+65bp</u> | <u>105+65bp</u> |
| <u>rs27991516</u> | 64.7                      | For: gaccaggaggtagccatcaa<br>Rev: acattggcaacctggagaag       | B6: T<br>BALB: G     | EcoR1  | B6: 102+96bp<br>BALB: 198bp                             | <u>102+96bp</u> | <u>102+96bp</u> |

|                          |       |                                                        |                  |       |                             |              |              |
|--------------------------|-------|--------------------------------------------------------|------------------|-------|-----------------------------|--------------|--------------|
| <u><i>rs27987286</i></u> | 66.9  | For: acactcggacaaccagatcc<br>Rev: tgacgtcatctgggctgata | B6: G<br>BALB: C | BsaJ1 | B6: 91+59bp<br>BALB: 150bp  | <u>150bp</u> | <u>150bp</u> |
| <u><i>rs13476554</i></u> | 67.09 | For: tctgtctgtgtggagtgtctg<br>Rev: gcatgcaaggcagttacta | B6: A<br>BALB: T | Tru91 | B6: 127+23bp<br>BALB: 150bp | <u>150bp</u> | <u>150bp</u> |
| <i>rs4136610</i>         | 70    | For: tggctcgggtgtactgtctg<br>Rev: tttccactctggaccaaca  | B6: G<br>BALB: A | Hinf1 | B6: 124+26bp<br>BALB: 150bp | 124+26bp     | 150bp        |
| <i>rs3667007</i>         | 81    | For: ctggtgcaaacactttggtc<br>Rev: ttggcatagggcactaaaga | B6: C<br>BALB: T | BsaJ1 | B6: 122+55bp<br>BALB: 177bp | 122+55bp     | 177bp        |

Supplemental Figure 1

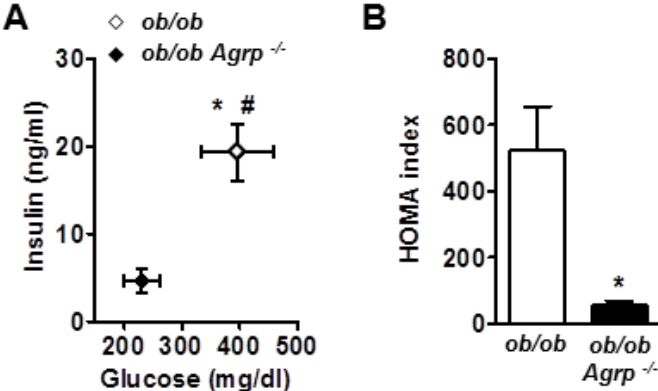

Supplemental Figure 2

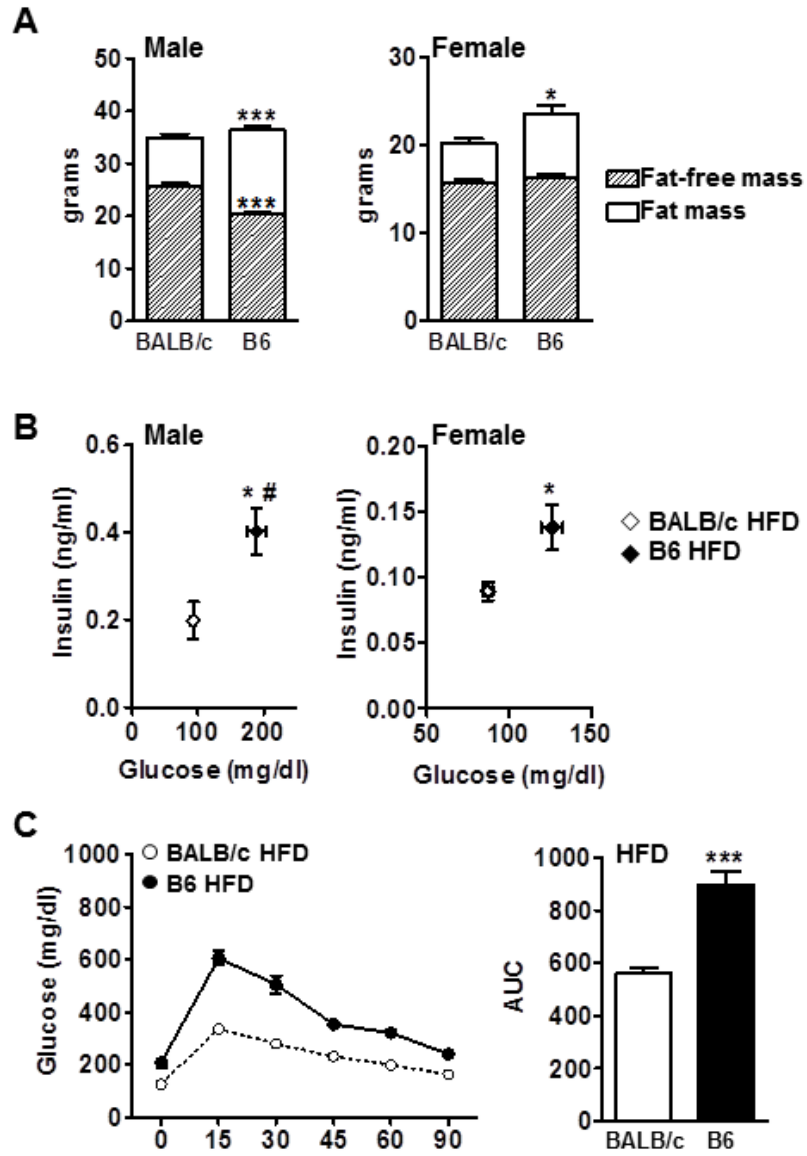

Supplemental Figure 3

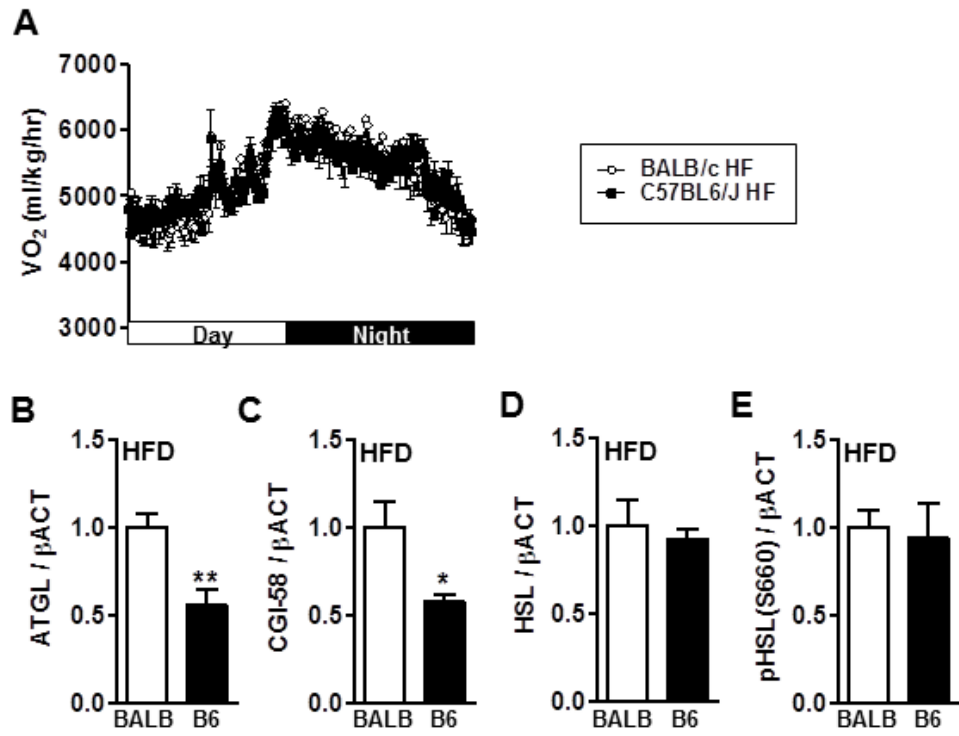



Supplemental Figure 4

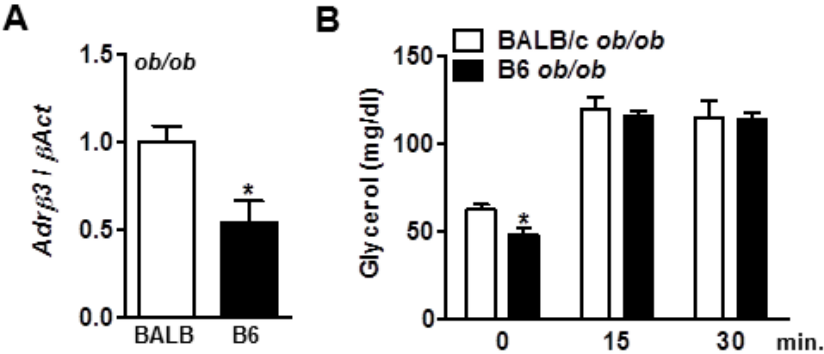

Supplemental figure 5

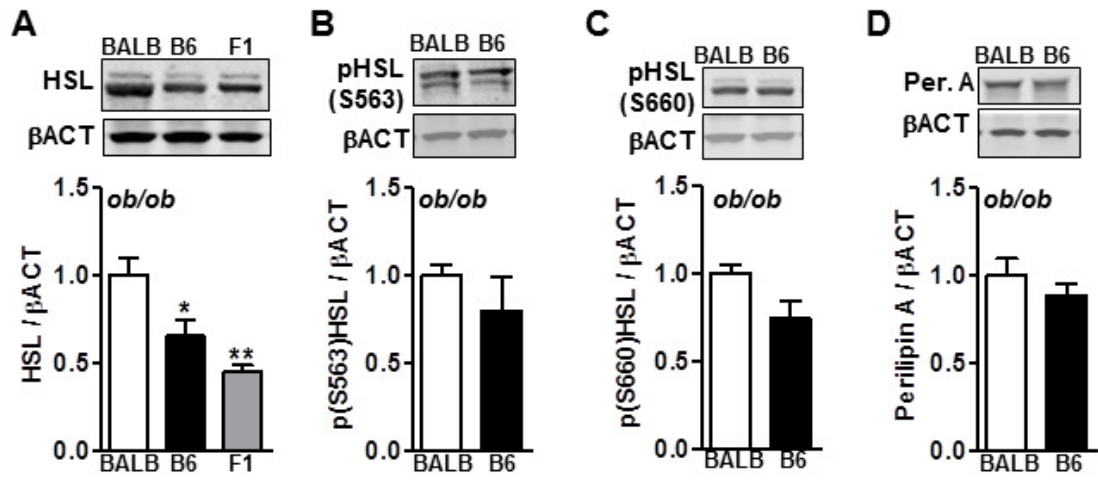

Supplemental figure 6

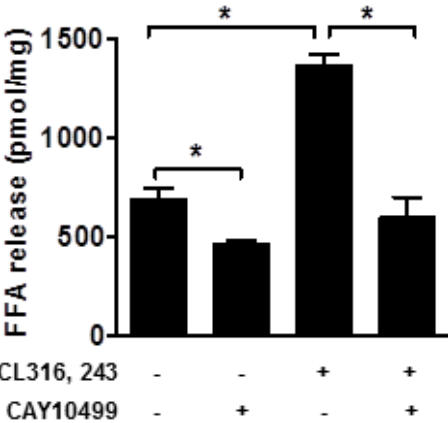

Supplement: supp_M022467_jlr.M022467-1.pdf [file supp_M022467_jlr.M022467-1.pdf]
